# Supplementary material
Source: PubMed Central journal article supplement (PMC2918259)
Supplement: supp_92_10_1938__1.pdf [file supp_92_10_1938__1.pdf]

TABLE E-1 Walking Speed and Plantar Pressure

|                                      | Arthroplasty* | Arthrodesis* | P Value |
|--------------------------------------|---------------|--------------|---------|
| Walking speed ( <i>m/min</i> )       | 61.19         | 59.71        | 0.373   |
| Pressure ( <i>N/cm<sup>2</sup></i> ) |               |              |         |
| Hindfoot                             | 31.11         | 39.71        | 0.184   |
| Midfoot                              | 11.27         | 16.13        | 0.114   |
| First metatarsal head                | 36.18         | 47.75        | 0.330   |
| Second metatarsal head               | 51.80         | 49.95        | 0.850   |
| Third metatarsal head                | 43.26         | 56.46        | 0.086   |
| Fourth metatarsal head               | 27.03         | 32.13        | 0.199   |
| Fifth metatarsal head                | 23.86         | 24.29        | 0.953   |
| Great toe                            | 33.26         | 67.13        | 0.007   |
| Aggregate of toes 2 to 5             | 25.06         | 36.11        | 0.094   |

\*The values are given as the mean.

TABLE E-2 Range of Motion

|                                    | Arthroplasty*<br>(deg) | Arthrodesis*<br>(deg) | P Value |
|------------------------------------|------------------------|-----------------------|---------|
| First metatarsophalangeal          |                        |                       |         |
| Active                             |                        |                       |         |
| Plantar flexion                    | -11.73                 |                       |         |
| Dorsiflexion                       | 42.18                  |                       |         |
| Total range of motion              | 30.45                  |                       |         |
| Passive                            |                        |                       |         |
| Plantar flexion                    | 1.64                   |                       |         |
| Dorsiflexion                       | 51.91                  |                       |         |
| Total range of motion              | 53.55                  |                       |         |
| Interphalangeal                    |                        |                       |         |
| Active                             |                        |                       |         |
| Plantar flexion                    | 18.45                  | 37.38                 | 0.019   |
| Dorsiflexion                       | 4.45                   | 5.96                  | 0.314   |
| Total range of motion              | 22.90                  | 43.34                 | 0.008   |
| Passive                            |                        |                       |         |
| Plantar flexion                    | 34.73                  | 52.88                 | 0.023   |
| Dorsiflexion                       | 11.82                  | 13.57                 | 0.578   |
| Total range of motion              | 46.55                  | 66.45                 | 0.039   |
| Ankle                              |                        |                       |         |
| Active                             |                        |                       |         |
| Dorsiflexion with knee flexed      | 8.82                   | 6.88                  | 0.443   |
| Dorsiflexion with knee extended    | 1.82                   | 1.63                  | 0.936   |
| Plantar flexion with knee flexed   | 48                     | 53.25                 | 0.136   |
| Plantar flexion with knee extended | 49                     | 53.75                 | 0.116   |
| Passive                            |                        |                       |         |
| Dorsiflexion with knee flexed      | 15.64                  | 13.88                 | 0.538   |
| Dorsiflexion with knee extended    | 7.73                   | 7.5                   | 0.915   |
| Plantar flexion with knee flexed   | 54.82                  | 58.5                  | 0.175   |
| Plantar flexion with knee extended | 54.64                  | 58.63                 | 0.175   |

\*The values are given as the mean.
